# Supplementary material
Source: publisher figshare collection journal article supplement (https://acs.figshare.com/ndownloader/files/4523776)
Supplement: Supplementary file 1 [file 4523776]

## Supplementary Information For:

# Structure and Dynamics of Monomer-Template Complexation: An Explanation for Molecularly Imprinted Polymer Recognition Site Heterogeneity

Björn C. G. Karlsson,<sup>a</sup> John O'Mahony,<sup>a</sup> Jesper G. Karlsson,<sup>a</sup> Helen Bengtsson,<sup>a</sup> Leif A. Eriksson,<sup>b</sup> Ian A. Nicholls<sup>a\*</sup>

<sup>a</sup> Bioorganic and Biophysical Chemistry Laboratory, School of Pure and Applied Natural Sciences, University of Kalmar, SE-391 82 Kalmar, Sweden. <sup>b</sup> School of Chemistry, National University of Ireland – Galway, Galway, Ireland

Correspondence to:

Ian A. Nicholls

E-mail: [ian.nicholls@hik.se](mailto:ian.nicholls@hik.se)

Tel: +46-480 446258

Fax: +46-480 446244

| Table of Contents                                                 | Page           |
|-------------------------------------------------------------------|----------------|
| <sup>1</sup> H NMR Spectroscopy                                   |                |
| MAA-Bupivacaine Titration                                         |                |
| Bupivacaine Protons                                               | Figure S1 S2   |
| MAA Protons                                                       | Figure S2 S2   |
| MAA-Bupivacaine Continuous Variation Study                        |                |
| Bupivacaine Protons                                               | Figure S3 S3   |
| MAA Protons                                                       | Figure S4 S3   |
| Acetic acid-d <sub>4</sub> -EDMA-Bupivacaine Titration            |                |
| Bupivacaine Protons                                               | Figure S5 S4   |
| EDMA-Bupivacaine Titration Study                                  |                |
| Bupivacaine Protons                                               | Figure S6 S4   |
| Polymer Gelation                                                  | Figure S7 S5   |
| MD – Equilibration and Production Phase Data                      |                |
| Prepolymerization Mixtures SP and P                               |                |
| System Design and Methodology                                     | Table S1 S6    |
| Thermodynamic Properties                                          | Table S2 S6    |
| Hydrogen Bond Analysis                                            | Table S3 S7    |
| MD - Potentials of Mean Force Calculations                        |                |
| Thermodynamics                                                    | Table S4 S8-9  |
| Histograms                                                        | Figure S8 S9   |
| Potentials of Mean Force and Complexes                            | Figure S9 S10  |
| MD – RDF Analysis                                                 |                |
| Template-Crosslinker                                              | Figure S10 S11 |
| Template-Initiator                                                | Figure S11 S12 |
| Template-Template                                                 | Figure S12 S12 |
| Monomer-Monomer                                                   | Figure S13 S13 |
| Template-Porogen                                                  | Figure S14 S14 |
| Atomic Densities                                                  | Table S5 S15   |
| MD - Grid Density Analysis                                        |                |
| Simplified Prepolymerization Mixture (SP):                        |                |
| Template-Monomer                                                  | Figure S15 S16 |
| Template-Porogen                                                  | Figure S16 S17 |
| Prepolymerization Mixture (P):                                    |                |
| Template-Porogen                                                  | Figure S17 S18 |
| Template-Initiator                                                | Figure S18 S19 |
| Polymer-Template Rebinding Study                                  |                |
| Polymer Titration Data                                            | Figure S19 S20 |
| The Effect of Unsaturation on Functional Monomer-Template Binding |                |
| <sup>1</sup> H NMR Titration Experimental Info and Titration Data | Figure S20 S21 |
| MD Simulation Setup and Analyzed Grid Density Data                | Figure S21 S22 |

# <sup>1</sup>H NMR Spectroscopy

## MAA-Bupivacaine Titration

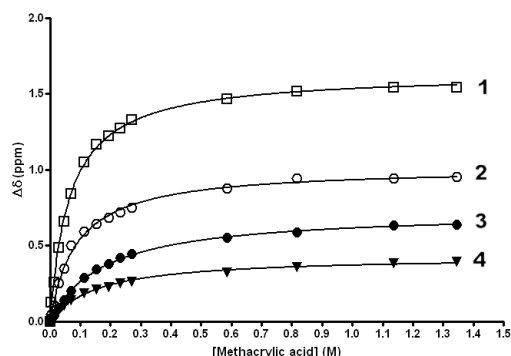

**Figure S1.** MAA-bupivacaine <sup>1</sup>H NMR titration experiment in CDCl<sub>3</sub> at 293 K. Analysis of the bupivacaine protons studied (see Chart 2) using a non-linear one-site binding model yielded:  $R^2 > 0.99$  and  $K_D = 0.065 \pm 0.001 \text{ M}$  ( $K_A = 15.4 \pm 0.1 \text{ M}^{-1}$ ) for **1** (□),  $R^2 > 0.99$  and  $K_D = 0.086 \pm 0.005 \text{ M}$  ( $K_A = 11.7 \pm 0.4 \text{ M}^{-1}$ ) for **2** (○),  $R^2 > 0.99$  and  $K_D = 0.154 \pm 0.009 \text{ M}$  ( $K_A = 6.5 \pm 0.2 \text{ M}^{-1}$ ) for **3** (●),  $R^2 > 0.99$  and  $K_D = 0.176 \pm 0.005 \text{ M}$  ( $K_A = 5.7 \pm 0.1 \text{ M}^{-1}$ ) for **4** (▼).

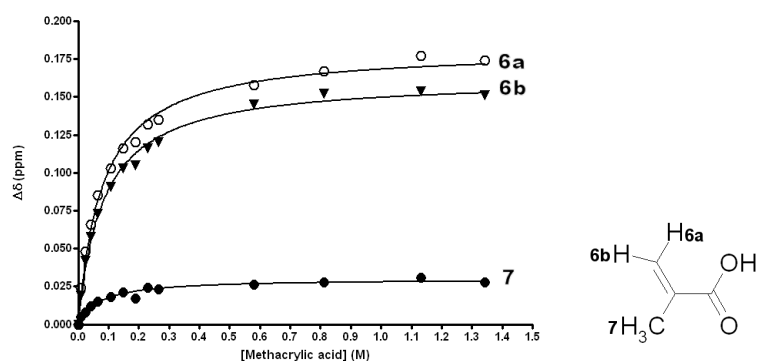

**Figure S2.** MAA-bupivacaine <sup>1</sup>H NMR titration experiment in CDCl<sub>3</sub> at 293 K. Analysis of the MAA protons studied using a non-linear one-site binding model yielded:  $R^2 > 0.99$  and  $K_D = 0.080 \pm 0.005 \text{ M}$  ( $K_A = 12.5 \pm 0.5 \text{ M}^{-1}$ ) for proton **6a** (○),  $R^2 > 0.99$  and  $K_D = 0.082 \pm 0.005 \text{ M}$  ( $K_A = 12.2 \pm 0.4 \text{ M}^{-1}$ ) for proton **6b** (▼),  $R^2 = 0.97$  and  $K_D = 0.071 \pm 0.011 \text{ M}$  ( $K_A = 14.3 \pm 1.3 \text{ M}^{-1}$ ) for proton **7** (●).

MAA-Bupivacaine Continuous Variation Study

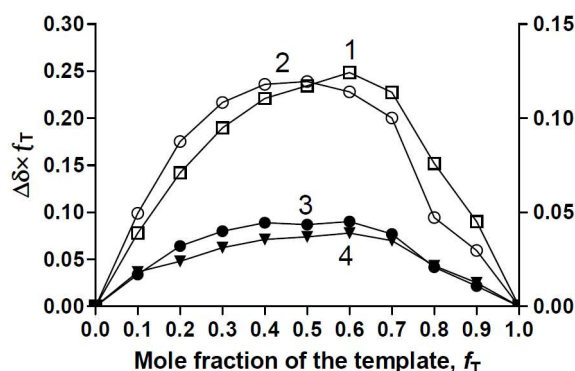

**Figure S3.** MAA-bupivacaine  $^1\text{H}$  NMR continuous variation experiment in  $\text{CDCl}_3$  at 293 K. Bupivacaine protons studied (see Chart 2) and the different optimal molar fractions of the template observed in the experiment were 0.6 for proton 1 ( $\square$ ), 0.4 for proton 2 ( $\circ$ ), 0.5 for proton 3 ( $\bullet$ ) and finally 0.6 for proton 4 ( $\blacktriangledown$ ). Protons 3 and 4 have due to smaller chemical shifts, been clarified by the addition of an extra y-axis on the right-hand side. The title on this axis is the same as on the left-hand side.

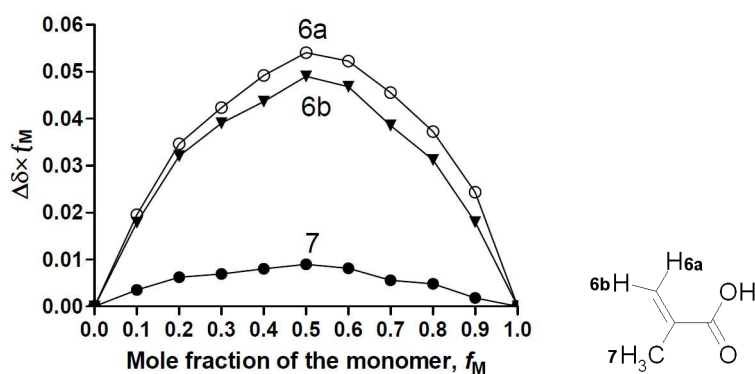

**Figure S4.** MAA-bupivacaine  $^1\text{H}$  NMR continuous variation experiment in  $\text{CDCl}_3$  at 293 K. MAA Protons studied and the different optimal molar fractions of bupivacaine observed in the experiment were 0.5 for proton 6a ( $\diamond$ ), 0.5 for proton 6b ( $\Delta$ ) and 0.5 for proton 7 ( $\blacktriangledown$ ).

### Acetic acid-*d*<sub>4</sub>-EDMA-Bupivacaine Titration

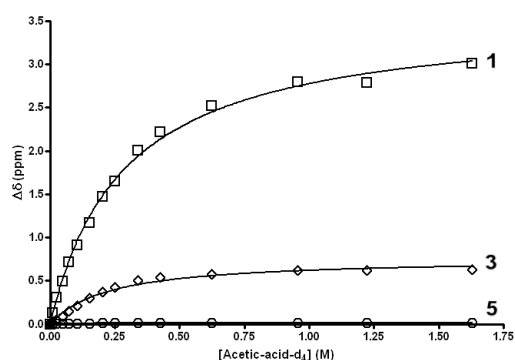

**Figure S5.** Acetic acid-*d*<sub>4</sub>-EDMA-bupivacaine <sup>1</sup>H NMR titration experiment in CDCl<sub>3</sub> at 293 K. Analysis of the bupivacaine protons (see Chart 2) studied using a non-linear one-site binding model yielded:  $R^2 > 0.99$  and  $K_D = 0.284 \pm 0.013$  M ( $K_A = 3.5 \pm 0.1$  M<sup>-1</sup>) for proton **1** (□),  $R^2 = 0.98$  and  $K_D = 0.225 \pm 0.026$  M ( $K_A = 4.5 \pm 0.3$  M<sup>-1</sup>) for proton **3** (◇),  $R^2 = 0.98$  and  $K_D = 0.091 \pm 0.012$  M ( $K_A = 11.1 \pm 0.9$  M<sup>-1</sup>) for proton **5** (○).

### EDMA-Bupivacaine Titration

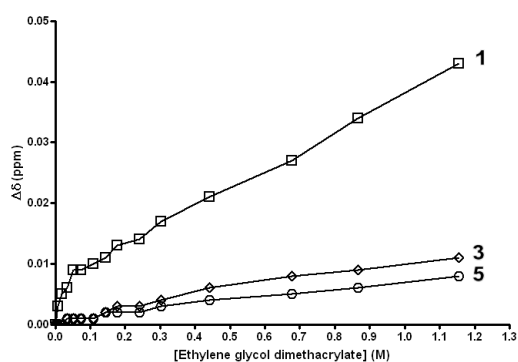

**Figure S6.** EDMA-bupivacaine <sup>1</sup>H NMR titration experiment in CDCl<sub>3</sub> at 293 K showing the bupivacaine protons studied (see Chart 2) **1** (□), **3** (◇) and **5** (○) upon addition of the crosslinker EDMA.

**Polymer Gelation**

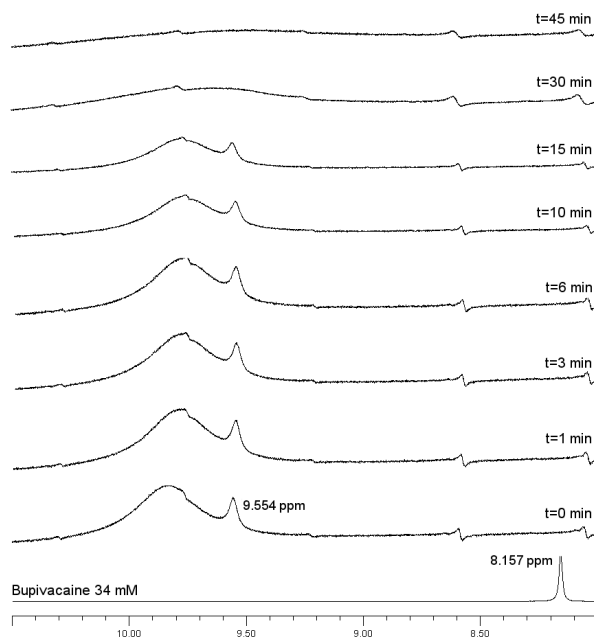

**Figure S7.** Fate of the bupivacaine complexation during the radical polymerization as studied by <sup>1</sup>H NMR spectroscopy following the bupivacaine amide proton (proton **1** in Chart 2) during the polymerization process in CDCl<sub>3</sub> at 293 K.

## MD - Equilibration and Production Run Data

### Prepolymerization Mixtures

#### System Design and Methodology

**TABLE S1: System Design and Molecular Dynamics Methodology Applied.**

| System <sup>a</sup> | Bupivacaine | MAA | EDMA | CHCl <sub>3</sub> | AIBN | Eq. (ps) <sup>b</sup> | Prod. (ns) |
|---------------------|-------------|-----|------|-------------------|------|-----------------------|------------|
| <b>SP</b>           | 7           | 79  | -    | 270               | -    | 20+200                | 5          |
| <b>P</b>            | 7           | 75  | 368  | 741               | 8    | 200+600               | 5          |

<sup>a</sup>The simplified prepolymerization (**SP**) and the prepolymerization (**P**) mixtures in chloroform. <sup>b</sup>The equilibration phase was divided into two parts in which the first part involved a process slowly heating the system from 0 to 293 K (NVT) followed by a longer equilibration step at NPT (293 K, 1 bar) to assure a stable value in density of the system (see Table S2).

#### Thermodynamic Properties

**TABLE S2: Thermodynamic Properties for the Different Systems Studied.**

| System <sup>a</sup> | Temp. (K)   | $\rho$ (g/cm <sup>3</sup> ) | Energies (kcal/mol) |                  |                  | Volume (Å <sup>3</sup> ) |
|---------------------|-------------|-----------------------------|---------------------|------------------|------------------|--------------------------|
|                     |             |                             | E <sub>POT</sub>    | E <sub>KIN</sub> | E <sub>TOT</sub> |                          |
| <b>SP</b>           | 293.2 ± 4.9 | 1.35                        | -3815.5 ± 37.0      | 2112.3 ± 35.0    | -1703.3 ± 50.3   | 37.0×37.0×36.8           |
| <b>P</b>            | 293.1 ± 2.0 | 1.25                        | -4905.2 ± 90.6      | 11775.8 ± 82.3   | 6870.6 ± 120.4   | 61.1×61.0×61.0           |

<sup>a</sup>The simplified prepolymerization (**SP**) and the prepolymerization (**P**) mixtures in chloroform.

## MD - Hydrogen Bond Analysis

**TABLE S3: Hydrogen Bonding Observed in the Prepolymerization Solutions Studied by MD. Values are Presented as Mean  $\pm$  Standard deviation.**

| Atom Pair |      | Occupied (%) <sup>a</sup> |             | Distance (Å)    |                 | Angle (°) <sup>b</sup> |                | Average lifetime, $\tau$ (ps) |                |
|-----------|------|---------------------------|-------------|-----------------|-----------------|------------------------|----------------|-------------------------------|----------------|
| Acc.      | Don. | SP                        | P           | SP              | P               | SP                     | P              | SP                            | P              |
| CO        | MH   | 47.8                      | 34.1        | 1.77 $\pm$ 0.04 | 1.79 $\pm$ 0.06 | 25.2 $\pm$ 9.2         | 24.0 $\pm$ 6.9 | 13.2 $\pm$ 7.1                | 11.9 $\pm$ 7.5 |
| AN        | MH   | 27.4                      | <i>n.d.</i> | 1.85 $\pm$ 0.03 | <i>n.d.</i>     | 22.1 $\pm$ 5.5         | <i>n.d.</i>    | 5.7 $\pm$ 2.4                 | <i>n.d.</i>    |
| MO        | AH   | 17.9                      | 0.3         | 1.89 $\pm$ 0.03 | 1.92 $\pm$ 0.02 | 33.9 $\pm$ 14.2        | 45.4 $\pm$ 5.1 | 1.8 $\pm$ 0.8                 | 1.1 $\pm$ 0.1  |
| MO1       | AH   | 0.3                       | <i>n.d.</i> | 1.92 $\pm$ 0.02 | <i>n.d.</i>     | 33.9 $\pm$ 15.2        | <i>n.d.</i>    | 1.2 $\pm$ 0.2                 | <i>n.d.</i>    |
| EO        | AH   |                           | 0.7         |                 | 1.91 $\pm$ 0.02 |                        | 41.7 $\pm$ 1.9 |                               | 1.2 $\pm$ 0.2  |
| EO1       | AH   |                           | <i>n.d.</i> |                 | <i>n.d.</i>     |                        | <i>n.d.</i>    |                               | <i>n.d.</i>    |
| EO2       | AH   |                           | <i>n.d.</i> |                 | <i>n.d.</i>     |                        | <i>n.d.</i>    |                               | <i>n.d.</i>    |
| EO3       | AH   |                           | 0.7         |                 | 1.92 $\pm$ 0.04 |                        | 42.4 $\pm$ 2.9 |                               | 1.1 $\pm$ 0.1  |
| CO        | AH   | <i>n.d.</i>               | 6.4         | <i>n.d.</i>     | 2.88 $\pm$ 0.02 | <i>n.d.</i>            | 35.1 $\pm$ 9.8 | <i>n.d.</i>                   | 0.5 $\pm$ 0.1  |
| AN        | AH   | 0.5                       | 0.7         | 2.86 $\pm$ 0.01 | 2.86 $\pm$ 0.00 | 58.1 $\pm$ 0.1         | 58.1 $\pm$ 0.2 | 0.2 $\pm$ 0.0                 | 0.2 $\pm$ 0.0  |

<sup>a</sup>The hydrogen-bonded state with respect to the total simulation time in average per template molecule present in the mixture. <sup>b</sup>Defines as the angle between three atoms whereas the hydrogen donating group includes two atoms such as *e.g.* *MO1-MH* and the hydrogen bond accepting atom includes a single atom such as *e.g.* atom *CO*. *n.d.* means not detected.

## MD- Potentials of Mean Force (PMFs) Calculations

### Thermodynamics

**TABLE S4: Thermodynamic Data Obtained From the Umbrella Sampling Simulations in Chloroform at 293 K Using Different Starting Coordinates.**

#### Series 1: CO-MH

| d <sub>0</sub> | d <sub>mean</sub> | Energies (kcal/mol) |                  |                  | Temp.       |
|----------------|-------------------|---------------------|------------------|------------------|-------------|
|                |                   | E <sub>pot</sub>    | E <sub>kin</sub> | E <sub>tot</sub> |             |
| 1.9            | 1.8               | -991.8 ± 21.7       | 846.1 ± 21.9     | -145.7 ± 30.2    | 293.0 ± 7.6 |
| 2.3            | 1.9               | -990.0 ± 22.4       | 847.7 ± 22.2     | -142.3 ± 31.7    | 293.6 ± 7.7 |
| 2.7            | 2.1               | -986.5 ± 21.7       | 849.2 ± 22.3     | -137.4 ± 31.0    | 294.1 ± 7.7 |
| 3.1            | 2.4               | -989.4 ± 21.7       | 845.7 ± 21.5     | -143.7 ± 29.8    | 292.9 ± 7.5 |
| 3.5            | 4.6               | -988.4 ± 21.4       | 847.4 ± 21.6     | -141.0 ± 29.5    | 293.5 ± 7.5 |
| 3.9            | 4.8               | -991.0 ± 21.8       | 847.0 ± 21.8     | -144.0 ± 30.5    | 293.3 ± 7.5 |
| 4.3            | 4.9               | -991.7 ± 21.3       | 846.6 ± 21.8     | -145.1 ± 30.0    | 293.2 ± 7.5 |
| 4.7            | 4.9               | -992.8 ± 21.2       | 845.8 ± 21.9     | -147.0 ± 30.0    | 292.9 ± 7.6 |
| 5.1            | 5.1               | -993.4 ± 21.9       | 846.2 ± 22.7     | -147.2 ± 30.4    | 293.1 ± 7.6 |
| 5.5            | 5.1               | -991.5 ± 21.8       | 846.9 ± 22.7     | -144.5 ± 31.4    | 293.3 ± 7.9 |
| 5.9            | 6.1               | -984.1 ± 22.3       | 847.7 ± 22.2     | -136.4 ± 31.7    | 293.6 ± 7.7 |
| 6.3            | 5.8               | -989.2 ± 21.5       | 846.8 ± 22.0     | -142.4 ± 30.1    | 293.3 ± 7.6 |
| 7.1            | 6.9               | -987.6 ± 22.1       | 845.7 ± 21.9     | -141.9 ± 31.2    | 292.9 ± 7.6 |
| 7.9            | 7.9               | -985.3 ± 22.1       | 845.9 ± 22.5     | -139.4 ± 31.8    | 293.0 ± 7.8 |
| 8.7            | 8.8               | -989.2 ± 21.8       | 844.6 ± 21.9     | -144.6 ± 30.6    | 292.5 ± 7.6 |
| 9.5            | 9.5               | -986.8 ± 21.8       | 846.8 ± 22.0     | -140.1 ± 30.9    | 293.3 ± 7.6 |
| 10.3           | 10.3              | -986.9 ± 22.5       | 847.3 ± 22.1     | -139.6 ± 31.7    | 293.4 ± 7.7 |

#### Series 2: AN-MH

| d <sub>0</sub> | d <sub>mean</sub> | Energies (kcal/mol) |                  |                  | Temp.       |
|----------------|-------------------|---------------------|------------------|------------------|-------------|
|                |                   | E <sub>pot</sub>    | E <sub>kin</sub> | E <sub>tot</sub> |             |
| 1.9            | 3.3               | -984.0 ± 21.8       | 846.7 ± 22.4     | -137.3 ± 30.9    | 293.3 ± 7.8 |
| 2.3            | 3.5               | -984.9 ± 21.7       | 847.5 ± 21.6     | -137.3 ± 30.1    | 293.5 ± 7.5 |
| 2.7            | 3.5               | -989.9 ± 21.1       | 845.7 ± 21.9     | -144.2 ± 29.7    | 292.9 ± 7.6 |
| 3.1            | 3.8               | -988.5 ± 21.9       | 847.4 ± 22.1     | -141.2 ± 30.9    | 293.5 ± 7.7 |
| 3.5            | 3.8               | -989.3 ± 21.8       | 846.0 ± 22.1     | -143.4 ± 30.9    | 293.0 ± 7.7 |
| 3.9            | 4.1               | -990.4 ± 21.9       | 847.3 ± 22.4     | -143.1 ± 31.3    | 293.5 ± 7.8 |
| 4.3            | 4.5               | -988.9 ± 22.1       | 846.4 ± 22.1     | -142.1 ± 31.4    | 293.1 ± 7.7 |
| 4.7            | 4.8               | -992.8 ± 21.1       | 846.2 ± 21.6     | -146.6 ± 29.4    | 293.1 ± 7.5 |
| 5.1            | 5.0               | -992.2 ± 21.4       | 846.1 ± 21.7     | -143.1 ± 29.4    | 293.0 ± 7.5 |
| 5.5            | 5.2               | -993.4 ± 21.5       | 845.6 ± 21.9     | -147.9 ± 30.2    | 292.9 ± 7.6 |
| 5.9            | 5.7               | -987.7 ± 22.5       | 847.0 ± 22.5     | -140.7 ± 32.5    | 293.3 ± 7.8 |
| 6.3            | 6.3               | -984.4 ± 22.2       | 847.0 ± 22.1     | -137.4 ± 31.5    | 293.3 ± 7.7 |
| 7.1            | 7.2               | -985.6 ± 21.6       | 847.0 ± 21.9     | -138.6 ± 30.5    | 293.3 ± 7.6 |
| 7.9            | 8.0               | -986.3 ± 21.5       | 846.9 ± 21.8     | -139.4 ± 29.7    | 293.3 ± 7.6 |
| 8.7            | 8.7               | -985.5 ± 21.9       | 846.9 ± 21.8     | -138.1 ± 31.4    | 293.5 ± 7.8 |
| 9.5            | 9.5               | -986.2 ± 23.2       | 846.7 ± 22.8     | -139.5 ± 33.7    | 293.3 ± 7.9 |
| 10.3           | 10.3              | -987.0 ± 22.0       | 846.9 ± 22.1     | -140.1 ± 31.7    | 293.3 ± 7.7 |



**Series 3: AH-MH**

| $d_0$ | $d_{\text{mean}}$ | Energies (kcal/mol) |                  |                   | Temp.           |
|-------|-------------------|---------------------|------------------|-------------------|-----------------|
|       |                   | $E_{\text{pot}}$    | $E_{\text{kin}}$ | $E_{\text{tot}}$  |                 |
| 1.9   | 3.4               | $-985.9 \pm 21.3$   | $845.4 \pm 22.1$ | $-140.5 \pm 30.5$ | $292.8 \pm 7.7$ |
| 2.3   | 3.6               | $-987.2 \pm 21.9$   | $846.7 \pm 22.2$ | $-140.5 \pm 31.2$ | $293.2 \pm 7.7$ |
| 2.7   | 3.7               | $-988.1 \pm 22.4$   | $846.6 \pm 23.2$ | $-141.5 \pm 32.9$ | $293.2 \pm 8.0$ |
| 3.1   | 3.9               | $-991.0 \pm 21.4$   | $846.2 \pm 21.4$ | $-144.8 \pm 29.3$ | $293.1 \pm 7.4$ |
| 3.5   | 4.0               | $-991.9 \pm 22.4$   | $845.3 \pm 22.2$ | $-146.6 \pm 32.1$ | $292.8 \pm 7.7$ |
| 3.9   | 4.3               | $-992.2 \pm 21.1$   | $845.0 \pm 22.8$ | $-147.2 \pm 32.1$ | $292.6 \pm 7.9$ |
| 4.3   | 4.5               | $-990.9 \pm 22.1$   | $846.8 \pm 22.3$ | $-144.1 \pm 31.7$ | $293.3 \pm 7.7$ |
| 4.7   | 4.7               | $-992.9 \pm 21.5$   | $846.5 \pm 22.3$ | $-146.4 \pm 30.7$ | $293.2 \pm 7.7$ |
| 5.1   | 4.9               | $-990.7 \pm 22.2$   | $846.3 \pm 22.3$ | $-144.4 \pm 31.8$ | $293.1 \pm 7.7$ |
| 5.5   | 5.0               | $-988.7 \pm 21.0$   | $848.8 \pm 21.5$ | $-139.9 \pm 28.5$ | $294.0 \pm 7.5$ |
| 5.9   | 5.6               | $-989.2 \pm 22.5$   | $846.0 \pm 22.5$ | $-143.2 \pm 32.5$ | $293.0 \pm 7.8$ |
| 6.3   | 5.6               | $-988.8 \pm 21.5$   | $845.2 \pm 21.7$ | $-143.6 \pm 29.8$ | $292.7 \pm 7.5$ |
| 7.1   | 7.1               | $-984.8 \pm 20.9$   | $847.9 \pm 21.1$ | $-136.9 \pm 28.2$ | $293.7 \pm 7.3$ |
| 7.9   | 7.9               | $-984.3 \pm 21.5$   | $848.6 \pm 22.0$ | $-135.7 \pm 30.5$ | $293.9 \pm 7.6$ |
| 8.7   | 8.7               | $-989.8 \pm 22.4$   | $844.7 \pm 22.4$ | $-145.1 \pm 31.9$ | $293.6 \pm 7.8$ |
| 9.5   | 9.5               | $-987.2 \pm 22.1$   | $848.0 \pm 22.0$ | $-139.1 \pm 31.1$ | $293.7 \pm 7.6$ |
| 10.3  | 10.3              | $-988.6 \pm 21.1$   | $847.1 \pm 21.7$ | $-141.5 \pm 29.2$ | $293.4 \pm 7.5$ |

**Histograms**

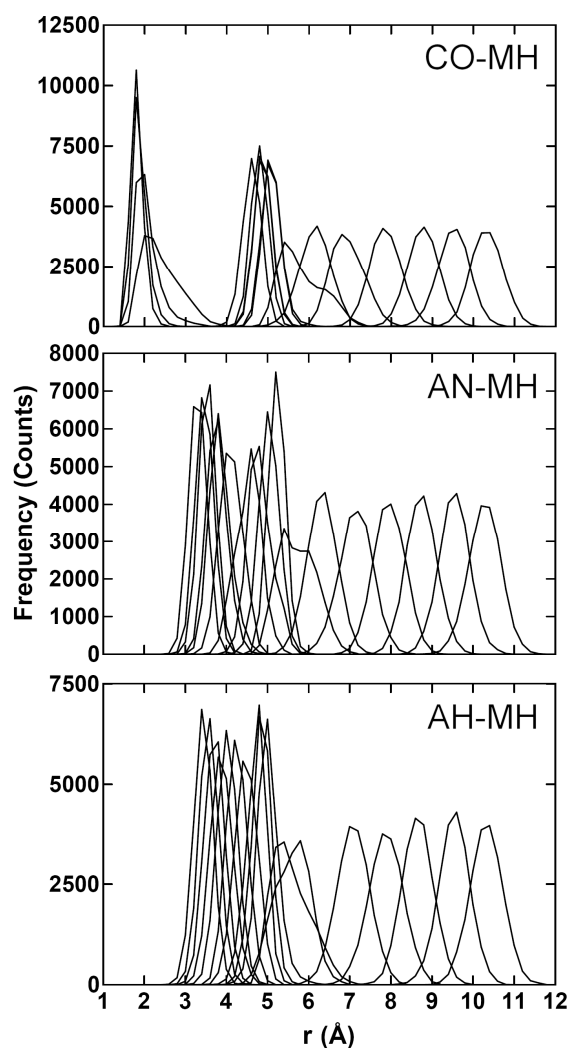

**Figure S8.** Histograms used for the generation of bupivacaine-MAA potentials of mean force in chloroform at 293 K.

## Potentials of Mean Force and Complexes

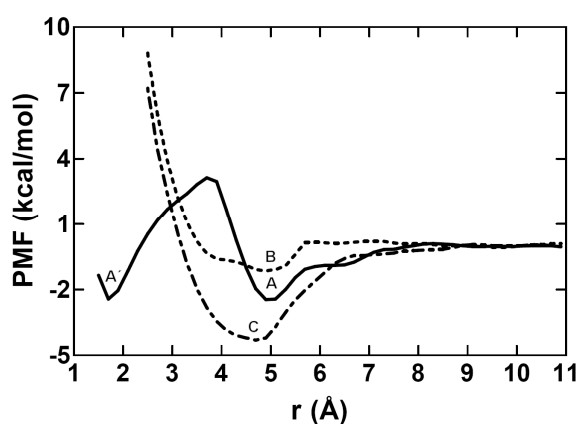

**Figure S9.** Bupivacaine-MAA potentials of mean force in chloroform at 293 K: starting coordinates 1 (CO-MH, —), 2 (AN-MH, ..... ) and 3 (AH-MH, - · - ·).

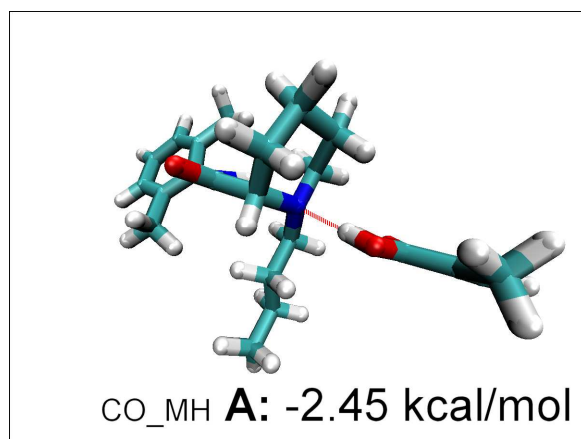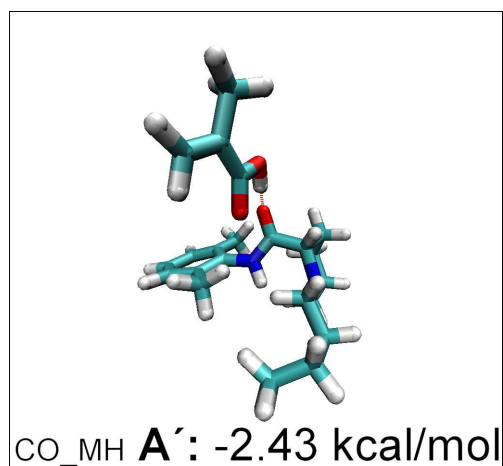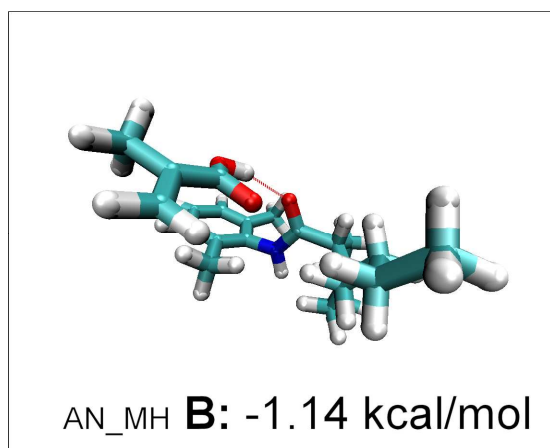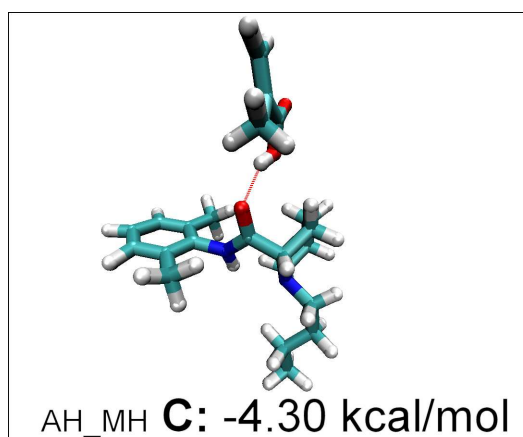

**MD – RDF Analysis**  
**Template-Crosslinker**

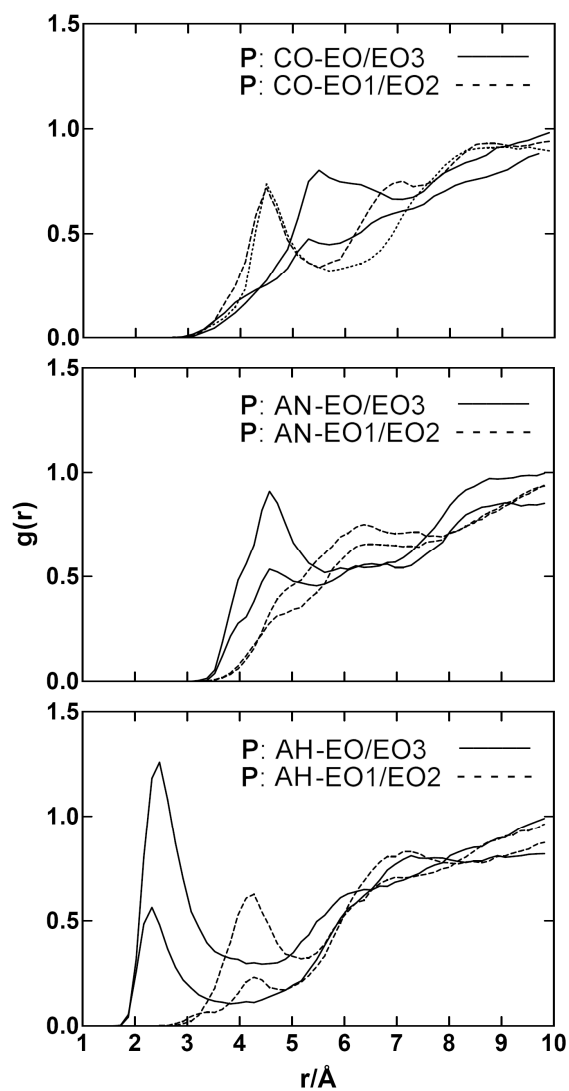

**Figure S10.** RDFs for the distribution of the EDMA oxygen atoms at the bupivacaine functional groups studied in the full-scale prepolymerization mixture, **P** (see Chart 1 for a description of the atoms analyzed).

**Template-Initiator**

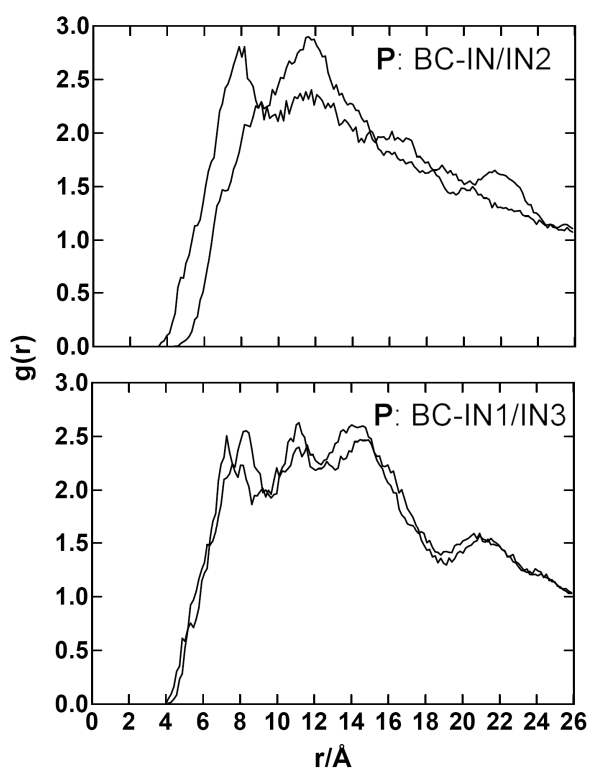

**Figure S11.** Atomic Distributions of AIBN at the *BC* atom of bupivacaine in the **P** mixture (see Chart 1 for a description of the atoms analyzed).

**Template-Template**

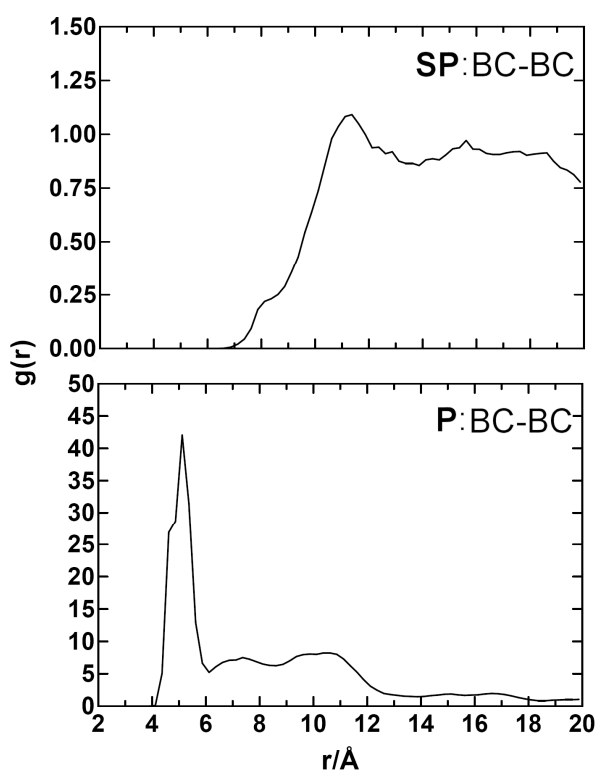

**Figure S12.** Template-Template distributions for the different prepolymerization mixtures studied (see Chart 1 for a description of the atoms analyzed).

**Monomer-Monomer**

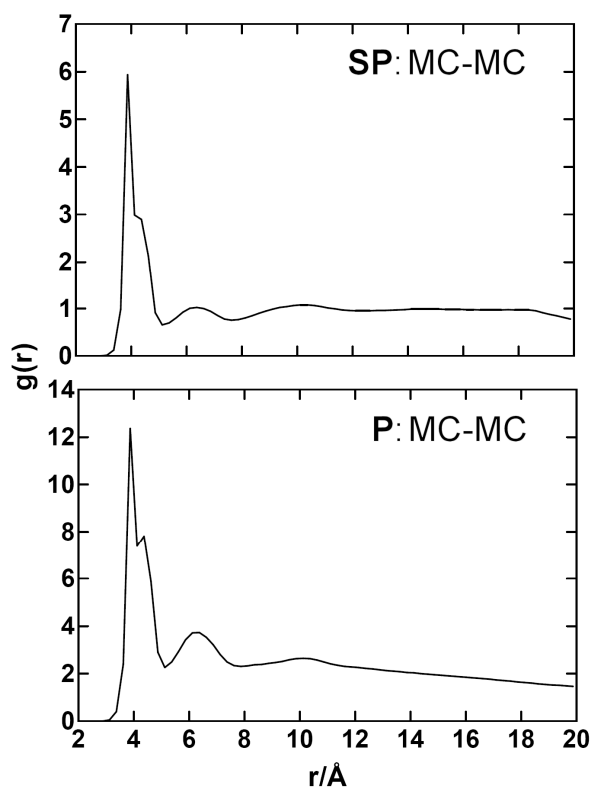

**Figure S13.** MAA-MAA Distributions for the different prepolymerization mixtures studied (see Chart 1 for a description of the atoms analyzed).

**Template-Porogen**

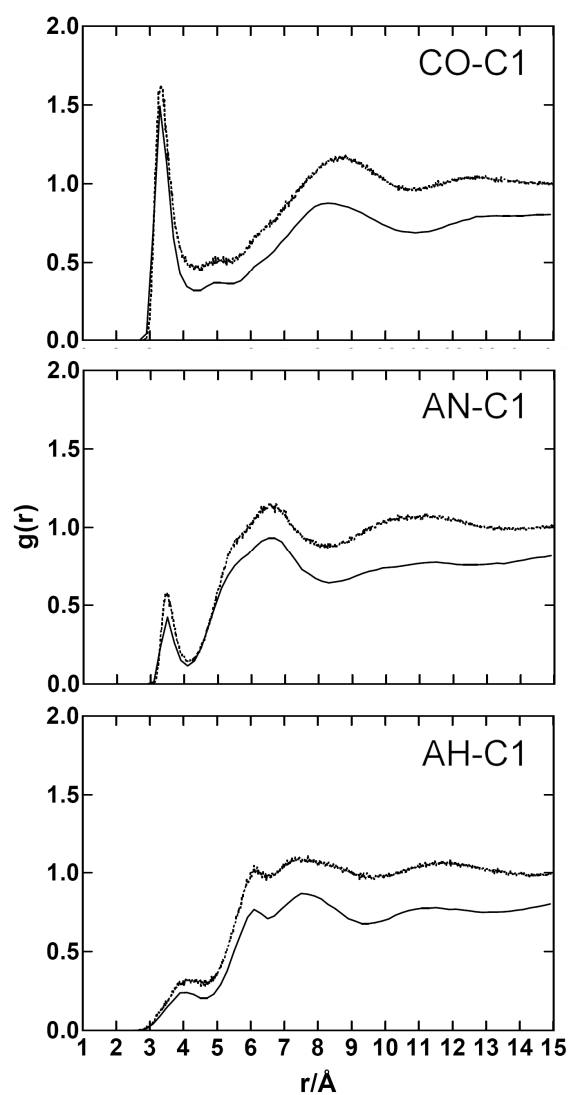

**Figure S14.** RDFs for the distribution of the central carbon atom (CI) of chloroform at the bupivacaine functional groups studied in the **SP** (solid lines) or in the **P** (dashed lines) mixtures (see Chart 1 for a description of the atoms analyzed).

Atomic Densities

TABLE S5: Data Obtained from the RDF Analysis<sup>a</sup>

| Molecules             | Atom Pair | Peaks: $r(\text{\AA})$ [g(r)] |           |           | $n(r)$ [ $R_{\text{cut}}(\text{\AA})$ ] <sup>b</sup> |            |             |
|-----------------------|-----------|-------------------------------|-----------|-----------|------------------------------------------------------|------------|-------------|
|                       |           | SP                            | P         | P         | SP                                                   | P          | P           |
| BUP-MAA               | CO-MH     | 1.7 [33]                      | 4.9 [1.9] | 6.1 [1.2] | 1.7 [81]                                             | 8.8 [3.0]  | 0.37 [2.6]  |
| BUP-MAA               | AN-MH     | 1.9 [14]                      | 4.7 [2.4] |           | 5.1 [6.0]                                            |            | 1.0 [6.4]   |
| BUP-MAA               | AH-MO     | 1.9 [12]                      | 4.1 [2.0] | 5.7 [1.4] | 2.5 [1.7]                                            | 5.6 [3.8]  | 0.044 [3.4] |
| BUP-EDMA              | CO-EO     |                               |           |           | 5.5 [0.79]                                           |            | 1.2 [6.9]   |
| BUP-EDMA              | CO-EO1    |                               |           |           | 4.4 [0.72]                                           |            | 0.38 [5.5]  |
| BUP-EDMA              | CO-EO2    |                               |           |           | 4.4 [0.73]                                           |            | 0.46 [5.9]  |
| BUP-EDMA              | CO-EO3    |                               |           |           | <i>n.a.</i>                                          |            | <i>n.a.</i> |
| BUP-EDMA              | AN-EO     |                               |           |           | 4.5 [0.88]                                           |            | 0.62 [5.7]  |
| BUP-EDMA              | AN-EO1    |                               |           |           | <i>n.a.</i>                                          |            | <i>n.a.</i> |
| BUP-EDMA              | AN-EO2    |                               |           |           | <i>n.a.</i>                                          |            | <i>n.a.</i> |
| BUP-EDMA              | AN-EO3    |                               |           |           | <i>n.a.</i>                                          |            | <i>n.a.</i> |
| BUP-EDMA              | AH-EO     |                               |           |           | 2.5 [1.2]                                            |            | 0.24 [4.1]  |
| BUP-EDMA              | AH-EO1    |                               |           |           | 4.2 [1.6]                                            |            | 0.29 [5.1]  |
| BUP-EDMA              | AH-EO2    |                               |           |           | <i>n.a.</i>                                          |            | <i>n.a.</i> |
| BUP-EDMA              | AH-EO3    |                               |           |           | 2.3 [0.54]                                           |            | 0.081 [3.9] |
| BUP-AIBN              | BC-IN     |                               |           |           | 8.0 [2.8]                                            |            | 0.25 [9.5]  |
| BUP-AIBN              | BC-IN1    |                               |           |           | 8.2 [2.5]                                            |            | 0.24 [9.7]  |
| BUP-AIBN              | BC-IN2    |                               |           |           | 11.7 [2.9]                                           |            | 1.2 [16]    |
| BUP-AIBN              | BC-IN3    |                               |           |           | 7.2 [2.5]                                            |            | 0.15 [8.7]  |
| BUP-CHCl <sub>3</sub> | CO-C1     | 3.3 [1.6]                     | 8.7 [1.2] |           | 3.3 [1.5]                                            | 8.3 [0.87] | 0.48 [4.2]  |
| BUP-CHCl <sub>3</sub> | AN-C1     | 3.5 [0.60]                    | 6.6 [1.1] |           | 3.5 [0.43]                                           | 6.6 [0.93] | 0.11 [4.0]  |
| BUP-CHCl <sub>3</sub> | AH-C1     | <i>n.a.</i>                   |           |           | <i>n.a.</i>                                          |            | <i>n.a.</i> |
| BUP-BUP               | BC-BC     | <i>n.a.</i>                   |           |           | 5.1 [41]                                             |            | 0.40 [6.1]  |
| MAA-MAA               | MC-MC     | 3.9 [6.0]                     | 4.4 [3.0] | 6.3 [1.0] | 3.9 [12]                                             | 4.4 [7.9]  | 0.45 [4.2]  |
|                       |           |                               |           |           |                                                      |            | 0.82 [5.2]  |
|                       |           |                               |           |           |                                                      |            | 2.0 [7.5]   |

<sup>a</sup>Data are presented for the two molecular systems simulated; The simplified prepolymerization mixture (SP) in which the crosslinker EDMA and the initiator AIBN have been excluded and the full-scale prepolymerization mixture (P). <sup>b</sup>Values were obtained through numerical integration using the sum of  $g(r)$  from  $r=0$  up to the cutoff value. *n.a.* means not analyzed

**MD - Grid Density Analysis**  
***Simplified Prepolymerization Mixture (SP)***

Template-Monomer

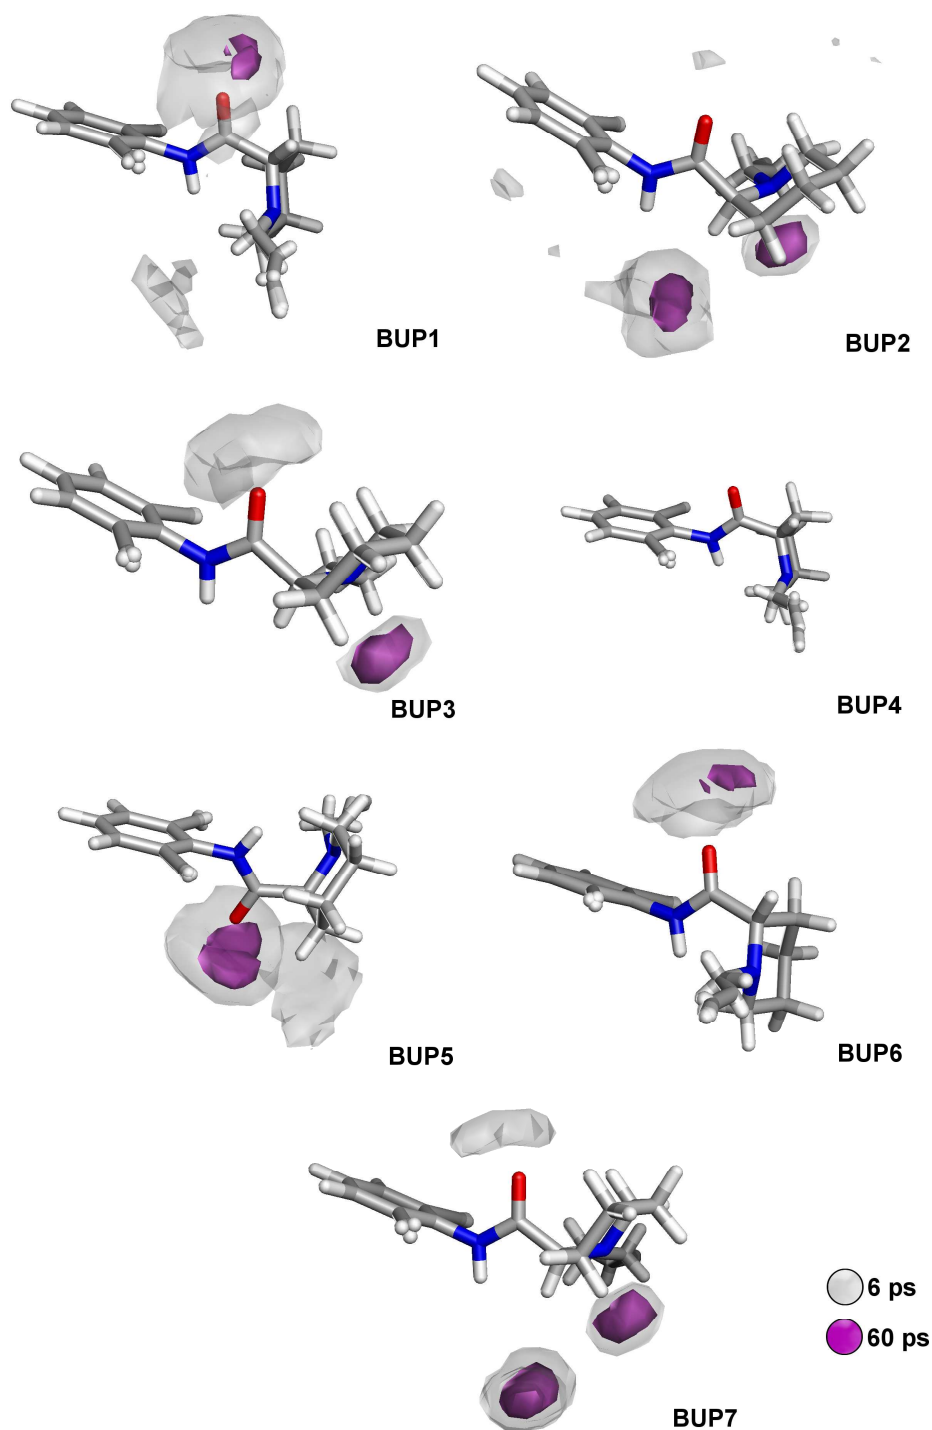

**Figure S15.** 3-D grid density representations showing probabilities of finding the acidic proton of MAA (*MH*, Chart 1) around each of the seven studied time-averaged stable structural conformations of bupivacaine that are present in the **SP** system (see Chart 1 for a description of the atoms analyzed).



Template-Porogen

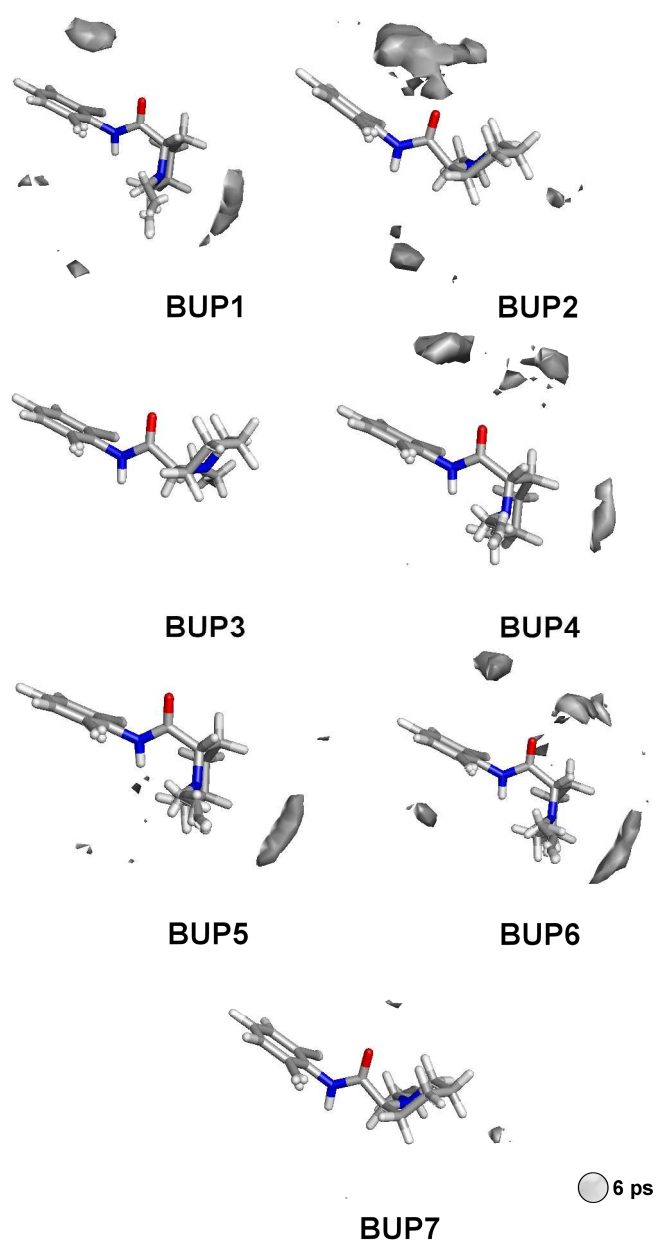

**Figure S16.** 3-D grid density representations showing probabilities of finding the central carbon of chloroform (*CI*, Chart 1) around each of the seven studied time-averaged stable structural conformations of bupivacaine that are present in the **SP** system (see Chart 1 for a description of the atoms analyzed).

**Prepolymerization Mixture (P)**

Template-Porogen

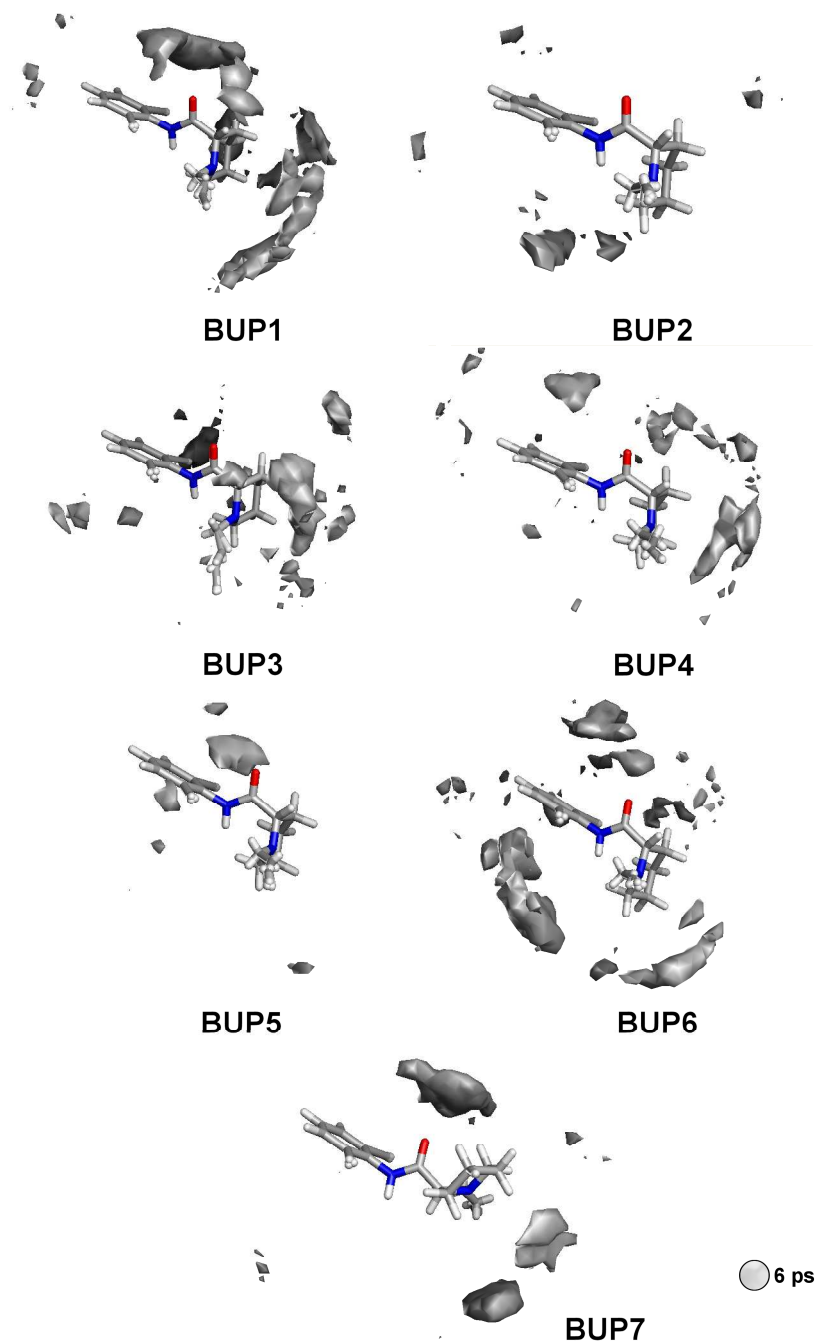

**Figure S17.** 3-D grid density representations showing probabilities of finding the central carbon of chloroform (CI, Chart 1) around each of the seven studied time-averaged stable structural conformations of bupivacaine that are present in the prepolymerization mixture (P) (see Chart 1 for a description of the atoms analyzed).

Template-Initiator

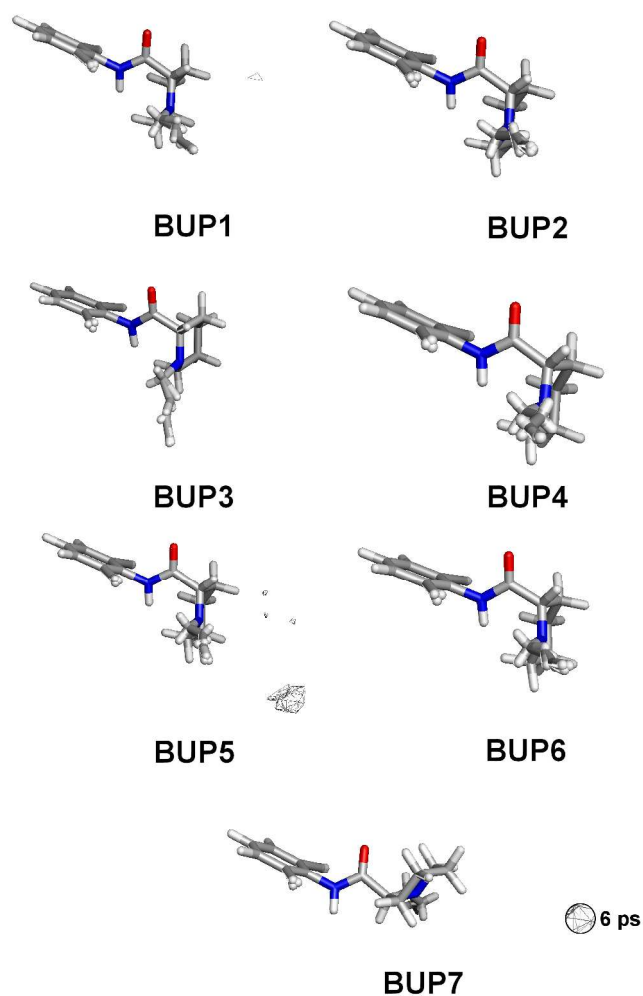

**Figure S18.** 3-D grid density representations showing probabilities of finding the *IN* (see Chart 1) atom of the initiator 2,2'-azo-bis(isobutyronitrile), AIBN, around each of the seven studied time-averaged stable structural conformations of bupivacaine that are present in the **P** mixture (see Chart 1 for a description of the atoms analyzed).

### Polymer-Template Rebinding Study Polymer Titration Data

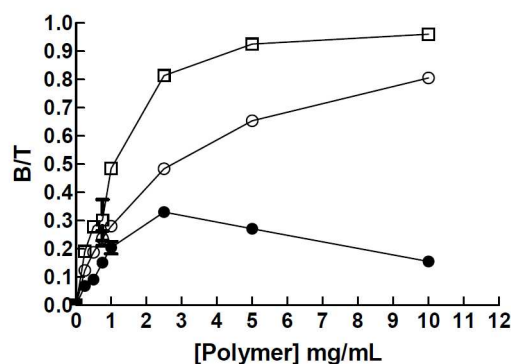

**Figure S19.** Data from the polymer titration experiment performed in toluene at 298 K. The specific binding of bupivacaine (●) is presented as the difference in the binding to the MIP (□) and the binding to the blank reference polymer (○). The polymer concentration used to obtain 50% template binding,  $PC_{50}$ , was found to be ~2.5 mg/mL for the REF ( $R^2=0.985$ ) and 0.9 mg/mL for the MIP ( $R^2=0.986$ ) (values obtained from a  $\log[\text{Polymer}]$  versus  $\text{logit}B/T$  plot).

**BET analysis** of the polymers resulted in a surface area of the REF of  $251.78 \pm 1.11 \text{ m}^2/\text{g}$  and MIP of  $104.83 \pm 2.60 \text{ m}^2/\text{g}$ . The average pore sizes diameters were found to be 5.8 nm for the MIP and 6.1 nm for the REF polymer, respectively.

### The Affect on Unsaturation on Functional Monomer-Template Binding

#### <sup>1</sup>H NMR Titration Experimental Info and Titration Data

Aliquots of a stock solution containing 2.31 M isobutyric acid and 34 mM bupivacaine were added to an NMR tube containing 0.7 mL of 34 mM of bupivacaine. Changes in the chemical shifts of selected bupivacaine  $\Delta\delta$  (ppm), were determined and plotted as a function of the concentration of isobutyric acid added (3.30 mM – 1.05 M).

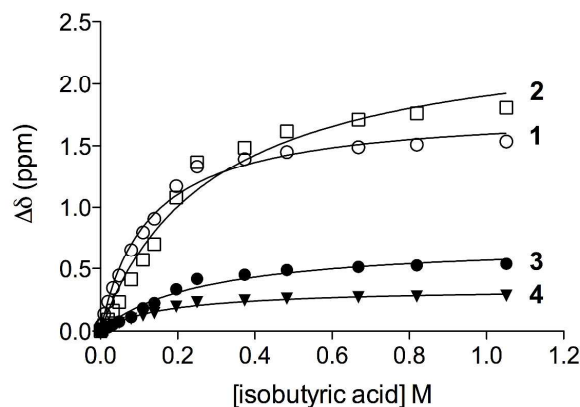

**Figure S20.** Isobutyric acid-bupivacaine <sup>1</sup>H NMR titration experiment in CDCl<sub>3</sub> at 293 K. Analysis of the bupivacaine protons studied (see Chart 2) using a non-linear one-site binding model yielded:

$R^2 > 0.99$  and  $K_D = 0.125 \pm 0.011$  M for **1** (□),

$R^2 > 0.99$  and  $K_D = 0.267 \pm 0.043$  M for **2** (○),

$R^2 > 0.99$  and  $K_D = 0.287 \pm 0.045$  M for **3** (●),

$R^2 > 0.99$  and  $K_D = 0.172 \pm 0.016$  M for **4** (▼).

### MD Simulation Setup and Grid Density Data

The simulated methacrylic acid or isobutyric-bupivacaine mixtures (6 bupivacaine, 61 methacrylic acid and 476 chloroform molecules or 6 bupivacaine, 64 isobutyric acid and XXX chloroform molecules) were prepared identically as being described under the *materials and methods* section. After equilibration for 250 ps under conditions of NPT (P=1 bar and T=293 K), to assure stable values in density and energy, grid density data was extracted for the distribution of functional monomer around the six bupivacaine molecules present in each system during a 5 ns production phase at NVT. The non-bonded used in the simulations was 9.0 Å and data was saved every 0.2 ps.

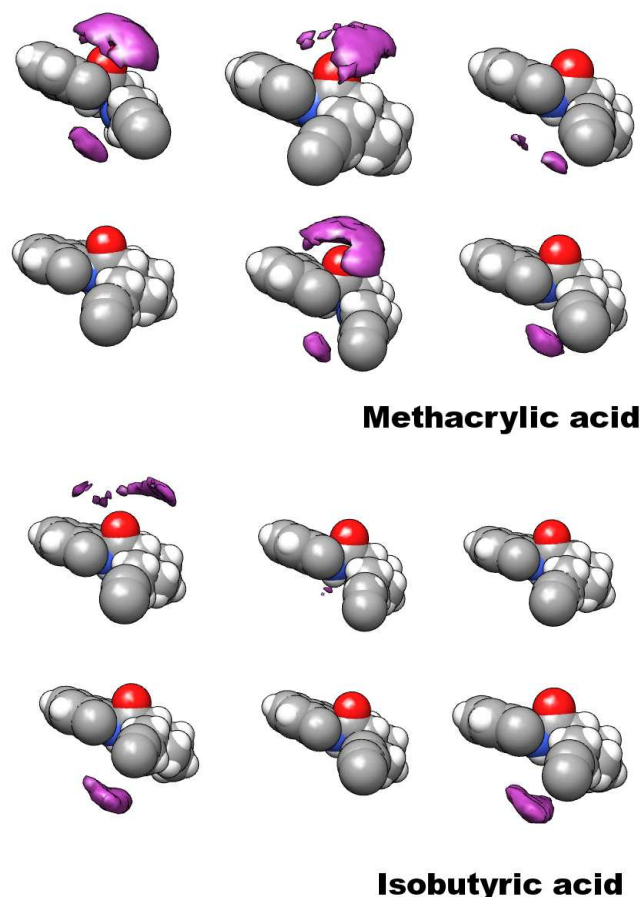

**Figure S21.** Grid density representation of the distribution of the acidic proton of methacrylic acid (MAA, top) or isobutyric acid (bottom) around the six template molecules present in each **SP** system during a 5 ns production phase at NVT in chloroform. Purple surfaces represent densities of functional monomer of  $\geq 6$  ps.
